# Supplementary material for: Association of antiphospholipid antibodies with active digital ulceration in systemic sclerosis
Source: PubMed Central journal article supplement — RMD Open. 2019 Sep 20;5(2):e001012. doi: 10.1136/rmdopen-2019-001012 (PMC6802995; doi:10.1136/rmdopen-2019-001012), 2019-09-20
Supplement: rmdopen-2019-001012supp001.pdf [file rmdopen-2019-001012supp001.pdf]

**Supplemental Table 1. SSc-related factors associated with APS**

| Characteristics                                  | APS-<br>N=161   | APS+<br>N=7      | P value      |
|--------------------------------------------------|-----------------|------------------|--------------|
| Age, years $\pm$ SD                              | 57.9 $\pm$ 14.9 | 56.2 $\pm$ 18    | 0.77         |
| Female, n (%)                                    | 142 (88)        | 5 (71)           | 0.19         |
| Smoking, n (%)                                   |                 |                  |              |
| Current or past                                  | 20 (12)         | 0 (0)            | 0.42         |
| Never                                            | 129 (80)        | 7 (100)          |              |
| NA                                               | 12 (7)          | 0 (0)            |              |
| SSc type, n (%)                                  |                 |                  |              |
| Limited                                          | 68 (42)         | 1 (14)           | 0.14         |
| Diffuse                                          | 93 (58)         | 6 (86)           |              |
| Disease duration, years $\pm$ SD†                | 7.9 $\pm$ 12.9  | 15.8 $\pm$ 22.4  | 0.13         |
| Modified Rodnan skin score (0–51), mean (Q1, Q3) | 8.0 (4.0, 19.0) | 10.5 (2.0, 26.0) | 0.80         |
| ADU, n (%)                                       | 45 (28)         | 3 (43)           | 0.39         |
| Digital tip ulcerations, n (%)                   | 43 (96)         | 1 (33)           |              |
| Digital gangrene, n (%)                          | 2 (4)           | 2 (77)           |              |
| Raynaud's severity score (0–4), mean (Q1, Q3)    | 1.0 (1.0, 3.0)  | 2.0 (1.0, 4.0)   | 0.17         |
| PAH                                              |                 |                  |              |
| Suspected PAH on echocardiography, n (%)         | 17 (11)         | 2 (29)           | 0.14         |
| sPAP (mmHg), mean $\pm$ SD                       | 31.6 $\pm$ 13.7 | 35.6 $\pm$ 13.8  | 0.53         |
| PAH on RHC, n (%)                                | 11 (7)          | 1 (14)           | 0.45         |
| mPAP (mmHg), mean $\pm$ SD                       | 30.6 $\pm$ 15   | 35.0 $\pm$ 21.2  | 0.70         |
| LVEF on echocardiography (%), mean $\pm$ SD      | 66.0 $\pm$ 8.9  | 68.0 $\pm$ 13.3  | 0.66         |
| ILD, n (%)                                       | 68 (42)         | 5 (71)           | 0.13         |
| FVC, % predicted $\pm$ SD                        | 94.7 $\pm$ 24.9 | 92.4 $\pm$ 23.2  | 0.84         |
| DLCO, % predicted $\pm$ SD                       | 69.3 $\pm$ 21.3 | 64.7 $\pm$ 17.5  | 0.60         |
| SSc-related Autoantibodies, n %                  |                 |                  |              |
| Anticentromere, n (%)                            | 75 (47)         | 1 (14)           | 0.09         |
| Anti-Scl70, n (%)                                | 55 (34)         | 5 (71)           | <b>0.046</b> |

ND: not done; NA: not available ; SD: standard deviations; Q1/Q3: quartile 1/quartile 3; SSc: systemic sclerosis; ADU: active digital ulceration; PAH: pulmonary arterial hypertension; sPAP: systolic pulmonary arterial pressure; mPAP: mean pulmonary arterial pressure; RHC: right heart catheterization; LVEF: left ventricular ejection fraction; IPD: interstitial pulmonary disease; FVC: forced vital capacity; DLCO: diffusing capacity of the lung for carbon monoxide

† Time from first non-Raynaud's symptom
