# Supplementary material for: Association of antiphospholipid antibodies with active digital ulceration in systemic sclerosis
Source: PubMed Central journal article supplement — RMD Open. 2019 Sep 20;5(2):e001012. doi: 10.1136/rmdopen-2019-001012 (PMC6802995; doi:10.1136/rmdopen-2019-001012), 2019-09-20
Supplement: rmdopen-2019-001012supp004.pdf [file rmdopen-2019-001012supp004.pdf]

**Supplemental Table 4. aPL, APS and past thrombotic event prevalences according to the different RP subsets**

| Characteristics                            | No RP<br>N=5 | Non complicated RP<br>N=96 | Pitting scars<br>N=19 | Tip ulceration<br>N=44 | Gangrene<br>N=4 |
|--------------------------------------------|--------------|----------------------------|-----------------------|------------------------|-----------------|
| LA, n (%)                                  | 1 (20)       | 7 (7)                      | 2 (11)                | 6 (14)                 | 1 (25)          |
| aCL overall positivity, n (%)              | 0 (0)        | 8 (9)                      | 3 (16)                | 2 (5)                  | 1 (25)          |
| IgG                                        | -            | 7 (7)                      | 1 (5)                 | 1 (2)                  | 1 (25)          |
| IgM                                        | -            | 1 (1)                      | 1 (5)                 | 1 (2)                  | 0 (0)           |
| Anti-β2GP1 overall positivity              | 0 (0)        | 4 (4)                      | 1 (5)                 | 7 (16)                 | 2 (50)          |
| IgG                                        | -            | 1 (1)                      | 0 (0)                 | 5 (11)                 | 2 (50)          |
| IgM                                        | -            | 3 (3)                      | 1 (5)                 | 3 (7)                  | 1 (25)          |
| APS, n (%)                                 | 0 (0)        | 3 (3)                      | 1 (5)                 | 1 (2)                  | 2 (50)          |
| Overall arterial thrombosis history, n (%) | 0 (0)        | 2 (2)                      | 1 (5)                 | 1 (2)                  | 1 (25)          |
| Overall venous thrombosis history, n (%)   | 0 (0)        | 10 (10)                    | 2 (11)                | 0 (0)                  | 1 (25)          |

RP: Raynaud's phenomenon; LA: lupus anticoagulant; aCL: anticardiolipin; β2GP1: Beta2glycoprotein 1; APS: antiphospholipid syndrome
